# Supplementary material
Source: PubMed Central journal article supplement (PMC7219202)
Supplement: NIHMS1578398-supplement-1.pdf [file NIHMS1578398-supplement-1.pdf]

**Appendix**  
**Adolescent Smoking Susceptibility: Gender-Stratified Racial and Ethnic Differences, 1999–2018**  
**Kamke et al.**

**Appendix Table 1A.** Smoking Status (Never Smoker, Ever/Non-current Smoker, Current Smoker) by Gender and Race/Ethnicity, 1999–2018 (2013–2018 in Appendix Table 1B)

| Characteristic                        | 1999                         | 2000                         | 2002                         | 2004                         | 2006                         | 2009                         | 2011                         | 2012                         |
|---------------------------------------|------------------------------|------------------------------|------------------------------|------------------------------|------------------------------|------------------------------|------------------------------|------------------------------|
|                                       | (n=15,058)<br>N (Weighted %) | (n=35,828)<br>N (Weighted %) | (n=26,149)<br>N (Weighted %) | (n=27,933)<br>N (Weighted %) | (n=27,038)<br>N (Weighted %) | (n=22,679)<br>N (Weighted %) | (n=18,866)<br>N (Weighted %) | (n=24,658)<br>N (Weighted %) |
| Never smoker <sup>a</sup>             | 7,993 (51.9)                 | 17,171 (48.0)                | 13,836 (52.9)                | 16,305 (58.6)                | 16,697 (62.3)                | 14,563 (66.5)                | 12,759 (69.2)                | 17,894 (72.4)                |
| Sex (Missing=886)                     |                              |                              |                              |                              |                              |                              |                              |                              |
| Girl                                  | 4,074 (51.0)                 | 8,885 (51.8)                 | 7,166 (51.7)                 | 8,420 (51.4)                 | 8,712 (52.1)                 | 7,537 (50.0)                 | 6,588 (50.5)                 | 9,207 (50.5)                 |
| Boy                                   | 3,882 (48.9)                 | 8,283 (48.1)                 | 6,651 (48.2)                 | 7,800 (48.5)                 | 7,859 (47.8)                 | 7,007 (49.9)                 | 6,044 (49.4)                 | 8,682 (49.4)                 |
| Race/ethnicity (Missing=6,913)        |                              |                              |                              |                              |                              |                              |                              |                              |
| White                                 | 4,339 (60.9)                 | 9,453 (67.7)                 | 6,742 (66.4)                 | 7,788 (68.1)                 | 7,290 (66.4)                 | 7,099 (61.3)                 | 5,466 (62.1)                 | 9,736 (60.0)                 |
| Latino/a                              | 1,697 (14.8)                 | 3,423 (12.1)                 | 3,247 (13.9)                 | 3,788 (11.9)                 | 4,284 (13.8)                 | 3,726 (17.3)                 | 3,846 (18.3)                 | 3,871 (20.2)                 |
| Black                                 | 1,266 (18.9)                 | 2,661 (14.6)                 | 2,554 (13.7)                 | 2,935 (14.9)                 | 3,211 (14.8)                 | 2,332 (15.9)                 | 2,465 (14.5)                 | 2,402 (14.2)                 |
| Asian                                 | 368 (3.6)                    | 987 (3.5)                    | 844 (3.7)                    | 916 (3.8)                    | 1,106 (3.8)                  | 677 (4.3)                    | 462 (3.8)                    | 986 (4.4)                    |
| AI/AN/NHPI                            | 210 (1.5)                    | 457 (1.8)                    | 326 (2.0)                    | 287 (1.0)                    | 331 (1.0)                    | 240 (0.9)                    | 228 (1.1)                    | 321 (0.8)                    |
| Ever smoker, non-current <sup>b</sup> | 4,301 (29.0)                 | 11,814 (32.2)                | 8,394 (30.7)                 | 7,836 (26.2)                 | 7,038 (24.3)                 | 5,370 (21.8)                 | 4,142 (20.2)                 | 4,517 (18.2)                 |
| Sex (Missing=791)                     |                              |                              |                              |                              |                              |                              |                              |                              |
| Girl                                  | 2,054 (48.0)                 | 5,594 (47.5)                 | 4,028 (47.3)                 | 3,694 (47.1)                 | 3,428 (49.5)                 | 2,602 (48.0)                 | 1,864 (46.3)                 | 2,123 (46.2)                 |
| Boy                                   | 2,205 (51.9)                 | 6,204 (52.4)                 | 4,325 (52.6)                 | 4,050 (52.8)                 | 3,522 (50.4)                 | 2,733 (51.9)                 | 2,164 (53.6)                 | 2,386 (53.7)                 |
| Race/ethnicity (Missing=2,570)        |                              |                              |                              |                              |                              |                              |                              |                              |
| White                                 | 2,159 (55.0)                 | 5,608 (59.4)                 | 3,596 (59.5)                 | 2,851 (59.2)                 | 2,647 (59.5)                 | 2,235 (53.7)                 | 1,399 (51.0)                 | 2,096 (51.3)                 |
| Latino/a                              | 986 (16.9)                   | 2,877 (15.2)                 | 2,260 (17.2)                 | 2,447 (17.1)                 | 2,062 (17.4)                 | 1,755 (23.7)                 | 1,597 (26.2)                 | 1,293 (26.3)                 |
| Black                                 | 781 (24.2)                   | 2,308 (20.2)                 | 1,878 (17.8)                 | 1,744 (19.6)                 | 1,696 (19.2)                 | 976 (18.8)                   | 798 (18.0)                   | 710 (18.1)                   |
| Asian                                 | 119 (2.1)                    | 463 (2.4)                    | 321 (2.5)                    | 285 (2.7)                    | 231 (2.1)                    | 141 (2.5)                    | 111 (3.2)                    | 153 (2.8)                    |
| AI/AN/NHPI                            | 118 (1.5)                    | 401 (2.5)                    | 247 (2.7)                    | 176 (1.3)                    | 181 (1.5)                    | 108 (1.1)                    | 91 (1.4)                     | 118 (1.3)                    |
| Current smoker <sup>c</sup>           | 2,764 (18.9)                 | 6,843 (19.6)                 | 3,919 (16.2)                 | 3,792 (15.1)                 | 3,303 (13.2)                 | 2,746 (11.6)                 | 1,965 (10.5)                 | 2,247 (9.2)                  |
| Sex (Missing=188)                     |                              |                              |                              |                              |                              |                              |                              |                              |
| Girl                                  | 1,343 (48.8)                 | 3,204 (47.8)                 | 1,797 (47.6)                 | 1,844 (51.8)                 | 1,521 (48.9)                 | 1,210 (43.1)                 | 863 (43.9)                   | 945 (41.5)                   |
| Boy                                   | 1,403 (51.1)                 | 3,635 (52.1)                 | 2,114 (52.3)                 | 1,919 (48.1)                 | 1,757 (51.0)                 | 1,526 (56.8)                 | 1,076 (56.0)                 | 1,301 (58.4)                 |
| Race/ethnicity (Missing=795)          |                              |                              |                              |                              |                              |                              |                              |                              |
| White                                 | 1,779 (68.6)                 | 4,333 (73.3)                 | 2,289 (72.5)                 | 1,977 (75.4)                 | 1,799 (74.7)                 | 1,517 (66.3)                 | 940 (65.1)                   | 1,295 (63.2)                 |
| Latino/a                              | 503 (14.5)                   | 1,252 (11.0)                 | 885 (12.6)                   | 1,053 (12.7)                 | 866 (13.7)                   | 761 (20.8)                   | 682 (21.3)                   | 569 (23.5)                   |
| Black                                 | 289 (12.2)                   | 723 (11.0)                   | 481 (9.8)                    | 458 (8.9)                    | 395 (8.4)                    | 276 (8.2)                    | 227 (10.5)                   | 200 (10.1)                   |
| Asian                                 | 55 (1.8)                     | 245 (2.1)                    | 117 (1.9)                    | 92 (1.5)                     | 68 (1.1)                     | 65 (1.9)                     | 25 (1.2)                     | 52 (1.5)                     |
| AI/AN/NHPI                            | 99 (2.7)                     | 218 (2.4)                    | 127 (2.8)                    | 93 (1.2)                     | 90 (1.8)                     | 67 (2.5)                     | 58 (1.7)                     | 70 (1.4)                     |

<sup>a</sup>Never smokers are those who reported they never tried even 1 or 2 puffs of a cigarette in response to *Have you ever tried cigarette smoking, even one or two puffs?*

<sup>b</sup>Ever, non-current smokers are those who reported they had smoked at least 1 or 2 puffs in the past and did not smoke in the past 30 days or did not respond to smoking in the past 30 days question.

<sup>c</sup>Current smokers are those who reported they had smoked at least 1 or 2 puffs in the past and reported smoking at least once in the past 30 days. Current smokers include exclusive cigarette users and those who smoked cigarettes in addition to non-cigarette combustible and/or noncombustible tobacco products (dual and poly tobacco users).

AI/AN/NHPI, American Indian, Alaska Native, Native Hawaiian, and Pacific Islander.

**Appendix**  
**Adolescent Smoking Susceptibility: Gender-Stratified Racial and Ethnic Differences, 1999–2018**  
**Kamke et al.**

**Appendix Table 1B (continued).** Smoking Status (Never Smoker, Ever/Non-current Smoker, Current Smoker) by Gender and Race/Ethnicity, 1999–2018 (1999–2012 in Appendix Table 1A)

| Characteristic                        | 2013                         | 2014                         | 2015                         | 2016                         | 2017                         | 2018                         | Total                         |
|---------------------------------------|------------------------------|------------------------------|------------------------------|------------------------------|------------------------------|------------------------------|-------------------------------|
|                                       | (n=18,406)<br>N (Weighted %) | (n=22,007)<br>N (Weighted %) | (n=17,711)<br>N (Weighted %) | (n=20,675)<br>N (Weighted %) | (n=17,872)<br>N (Weighted %) | (n=20,189)<br>N (Weighted %) | (n=315,069)<br>N (Weighted %) |
| Never smoker <sup>a</sup>             | 13,220 (72.7)                | 16,709 (76.3)                | 13,681 (76.7)                | 16,666 (79.6)                | 14,634 (82.8)                | 16,462 (82.4)                | 208,590 (71.2)                |
| Sex (Missing=886)                     |                              |                              |                              |                              |                              |                              |                               |
| Girl                                  | 6,761 (49.9)                 | 8,334 (50.7)                 | 6,881 (50.0)                 | 8,260 (49.8)                 | 7,314 (49.1)                 | 8,243 (50.1)                 | 106,382 (50.4)                |
| Boy                                   | 6,454 (50.0)                 | 8,272 (49.2)                 | 6,738 (49.9)                 | 8,321 (50.1)                 | 7,225 (50.8)                 | 8,104 (49.8)                 | 101,322 (49.5)                |
| Race/ethnicity (Missing=6,913)        |                              |                              |                              |                              |                              |                              |                               |
| White                                 | 6,540 (58.2)                 | 7,576 (58.4)                 | 6,683 (57.7)                 | 7,259 (56.1)                 | 6,724 (56.1)                 | 7,873 (55.4)                 | 100,568 (60.0)                |
| Latino/a                              | 2,726 (20.0)                 | 4,543 (20.9)                 | 3,600 (22.7)                 | 4,554 (24.6)                 | 3,707 (24.1)                 | 4,706 (24.6)                 | 51,718 (19.9)                 |
| Black                                 | 2,417 (15.9)                 | 2,626 (15.6)                 | 1,983 (14.3)                 | 2,662 (13.3)                 | 2,691 (13.6)                 | 2,183 (13.4)                 | 34,888 (14.5)                 |
| Asian                                 | 700 (4.5)                    | 844 (4.0)                    | 595 (3.8)                    | 990 (4.6)                    | 668 (4.8)                    | 685 (5.2)                    | 10,828 (4.3)                  |
| AI/AN/NHPI                            | 246 (1.1)                    | 306 (0.8)                    | 237 (1.2)                    | 431 (1.1)                    | 251 (1.1)                    | 304 (1.1)                    | 4,175 (1.1)                   |
| Ever smoker, non-current <sup>b</sup> | 3,648 (18.9)                 | 3,906 (17.4)                 | 2,949 (17.1)                 | 3,032 (14.9)                 | 2,265 (12.0)                 | 2,628 (12.3)                 | 71,840 (19.4)                 |
| Sex (Missing=791)                     |                              |                              |                              |                              |                              |                              |                               |
| Girl                                  | 1,716 (46.1)                 | 1,754 (47.9)                 | 1,297 (45.6)                 | 1,418 (49.2)                 | 1,042 (45.3)                 | 1,204 (46.9)                 | 33,818 (47.2)                 |
| Boy                                   | 1,925 (53.8)                 | 2,055 (52.0)                 | 1,593 (54.3)                 | 1,553 (50.7)                 | 1,157 (54.6)                 | 1,359 (53.0)                 | 37,231 (52.7)                 |
| Race/ethnicity (Missing=2,570)        |                              |                              |                              |                              |                              |                              |                               |
| White                                 | 1,506 (49.9)                 | 1,560 (54.5)                 | 1,216 (50.3)                 | 1,219 (52.1)                 | 990 (57.9)                   | 1,260 (55.7)                 | 30,342 (54.9)                 |
| Latino/a                              | 1,031 (27.3)                 | 1,164 (25.6)                 | 958 (28.4)                   | 969 (30.6)                   | 656 (26.1)                   | 758 (26.6)                   | 20,813 (23.4)                 |
| Black                                 | 742 (18.0)                   | 667 (16.5)                   | 457 (15.7)                   | 473 (13.3)                   | 345 (11.5)                   | 308 (12.4)                   | 13,883 (17.1)                 |
| Asian                                 | 108 (3.1)                    | 103 (2.1)                    | 65 (2.6)                     | 80 (2.1)                     | 68 (2.4)                     | 54 (2.9)                     | 2,302 (2.6)                   |
| AI/AN/NHPI                            | 89 (1.5)                     | 86 (1.1)                     | 80 (2.7)                     | 106 (1.6)                    | 51 (1.8)                     | 78 (2.2)                     | 1,930 (1.7)                   |
| Current smoker <sup>c</sup>           | 1,538 (8.2)                  | 1,392 (6.1)                  | 1,081 (6.0)                  | 977 (5.3)                    | 973 (5.1)                    | 1,099 (5.2)                  | 34,639 (9.2)                  |
| Sex (Missing=188)                     |                              |                              |                              |                              |                              |                              |                               |
| Girl                                  | 700 (43.9)                   | 557 (42.6)                   | 444 (42.4)                   | 404 (43.0)                   | 459 (48.9)                   | 473 (44.8)                   | 15,764 (45.8)                 |
| Boy                                   | 837 (56.0)                   | 823 (57.3)                   | 627 (57.5)                   | 564 (56.9)                   | 499 (51.0)                   | 606 (55.1)                   | 18,687 (54.1)                 |
| Race/ethnicity (Missing=795)          |                              |                              |                              |                              |                              |                              |                               |
| White                                 | 811 (60.8)                   | 757 (66.3)                   | 583 (62.7)                   | 508 (66.7)                   | 553 (67.3)                   | 657 (67.6)                   | 19,798 (68.5)                 |
| Latino/a                              | 424 (25.2)                   | 374 (22.5)                   | 291 (24.4)                   | 270 (22.2)                   | 251 (23.0)                   | 297 (23.5)                   | 8,478 (19.0)                  |
| Black                                 | 191 (10.7)                   | 137 (8.2)                    | 101 (8.5)                    | 95 (7.0)                     | 83 (6.5)                     | 60 (5.5)                     | 3,716 (8.9)                   |
| Asian                                 | 30 (1.5)                     | 26 (1.4)                     | 13 (1.3)                     | 16 (1.0)                     | 18 (1.3)                     | 13 (1.5)                     | 835 (1.5)                     |
| AI/AN/NHPI                            | 35 (1.5)                     | 31 (1.2)                     | 35 (2.9)                     | 42 (2.8)                     | 28 (1.6)                     | 24 (1.6)                     | 1,017 (1.9)                   |

<sup>a</sup>Never smokers are those who reported they never tried even 1 or 2 puffs of a cigarette in response to *Have you ever tried cigarette smoking, even one or two puffs?*

<sup>b</sup>Ever, non-current smokers are those who reported they had smoked at least 1 or 2 puffs in the past and did not smoke in the past 30 days or did not respond to smoking in the past 30 days question.

<sup>c</sup>Current smokers are those who reported they had smoked at least 1 or 2 puffs in the past and reported smoking at least once in the past 30 days. Current smokers include exclusive cigarette users and those who smoked cigarettes in addition to non-cigarette combustible and/or non-combustible tobacco products (dual and poly tobacco users).

AI/AN/NHPI, American Indian, Alaska Native, Native Hawaiian, and Pacific Islander.

**Appendix**  
**Adolescent Smoking Susceptibility: Gender-Stratified Racial and Ethnic Differences, 1999–2018**  
**Kamke et al.**

**Appendix Table 2.** Smoking Susceptibility by Gender and Race/Ethnicity, 1999–2014

| Characteristic                             | 1999                   | 2000                   | 2002                   | 2004                   | 2006                   | 2009                   | 2011                   | 2012                   | 2013                   | 2014                   |
|--------------------------------------------|------------------------|------------------------|------------------------|------------------------|------------------------|------------------------|------------------------|------------------------|------------------------|------------------------|
|                                            | (n=7,782)              | (n=16,772)             | (n=13,505)             | (n=15,641)             | (n=15,795)             | (n=14,066)             | (n=12,699)             | (n=17,848)             | (n=13,161)             | (n=16,655)             |
|                                            | Weighted %<br>(95% CI) |
| Susceptibility to smoking                  |                        |                        |                        |                        |                        |                        |                        |                        |                        |                        |
| No                                         | 78.3<br>(76.8, 79.8)   | 77.7<br>(76.7, 78.8)   | 79.3<br>(78.0, 80.6)   | 77.7<br>(76.8, 78.7)   | 79.1<br>(77.9, 80.3)   | 79.5<br>(78.0, 80.9)   | 77.0<br>(75.6, 78.5)   | 72.2<br>(71.2, 73.1)   | 80.6<br>(79.4, 81.8)   | 72.3<br>(71.1, 73.6)   |
| Yes                                        | 21.6<br>(20.1, 23.1)   | 22.2<br>(21.1, 23.2)   | 20.6<br>(19.3, 21.9)   | 22.2<br>(21.2, 23.1)   | 20.8<br>(19.6, 22.0)   | 20.4<br>(19.0, 21.9)   | 22.9<br>(21.4, 24.3)   | 27.7<br>(26.8, 28.7)   | 19.3<br>(18.1, 20.5)   | 27.6<br>(26.3, 28.8)   |
| Girls' susceptibility overall <sup>a</sup> | 21.3<br>(19.5, 23.1)   | 22.4<br>(21.1, 23.7)   | 21.0<br>(19.5, 22.6)   | 21.7<br>(20.4, 23.0)   | 19.5<br>(18.1, 21.0)   | 21.0<br>(18.3, 23.6)   | 22.7<br>(20.9, 24.6)   | 26.4<br>(25.0, 27.8)   | 19.1<br>(17.5, 20.6)   | 26.9<br>(25.4, 28.5)   |
| White                                      | 21.1<br>(18.8, 23.4)   | 22.5<br>(20.7, 24.3)   | 21.0<br>(19.2, 22.7)   | 21.6<br>(19.8, 23.3)   | 18.9<br>(17.2, 20.5)   | 20.7<br>(17.6, 23.9)   | 21.7<br>(19.6, 23.8)   | 24.1<br>(22.3, 26.0)   | 16.8<br>(15.2, 18.3)   | 24.8<br>(22.9, 26.6)   |
| Latino/a                                   | 23.0<br>(20.1, 25.8)   | 26.1<br>(23.7, 28.4)   | 24.6<br>(21.9, 27.2)   | 27.6<br>(25.2, 30.0)   | 26.3<br>(23.5, 29.0)   | 27.4<br>(23.3, 31.4)   | 30.4<br>(26.3, 34.6)   | 33.5<br>(30.7, 36.3)   | 27.1<br>(24.2, 30.1)   | 34.0<br>(31.3, 36.7)   |
| Black                                      | 21.6<br>(17.3, 25.9)   | 19.7<br>(17.2, 22.2)   | 16.8<br>(14.0, 19.7)   | 18.2<br>(15.7, 20.7)   | 17.2<br>(14.5, 19.9)   | 16.2<br>(13.9, 18.5)   | 16.9<br>(13.4, 20.5)   | 26.6<br>(23.4, 29.8)   | 18.2<br>(14.5, 21.9)   | 26.4<br>(23.5, 29.4)   |
| Asian                                      | 14.5<br>(10.0, 19.1)   | 22.1<br>(18.0, 26.2)   | 21.4<br>(14.9, 27.9)   | 17.5<br>(13.7, 21.3)   | 15.2<br>(11.6, 18.8)   | 17.4<br>(8.9, 25.9)    | 20.8<br>(13.1, 28.6)   | 24.7<br>(17.0, 32.4)   | 16.2<br>(10.8, 21.6)   | 21.0<br>(16.2, 25.9)   |
| AI/AN/NHPI                                 | 26.2<br>(13.5, 38.8)   | 17.9<br>(12.3, 23.5)   | 27.9<br>(16.9, 39.0)   | 26.3<br>(17.1, 35.5)   | 23.1<br>(14.3, 31.8)   | 14.3<br>(6.7, 21.8)    | 34.2<br>(18.0, 50.5)   | 21.1<br>(14.0, 28.2)   | 17.1<br>(7.3, 26.8)    | 38.7<br>(25.5, 52.0)   |
| Boys' susceptibility overall <sup>a</sup>  | 22.0<br>(19.9, 24.1)   | 22.0<br>(20.7, 23.2)   | 20.1<br>(18.6, 21.6)   | 22.7<br>(21.4, 23.9)   | 22.0<br>(20.5, 23.4)   | 20.3<br>(18.6, 21.9)   | 22.9<br>(21.0, 24.8)   | 29.1<br>(28.0, 30.2)   | 19.4<br>(18.0, 20.9)   | 28.6<br>(27.0, 30.1)   |
| White                                      | 22.2<br>(19.1, 25.3)   | 21.3<br>(19.7, 22.8)   | 19.7<br>(17.8, 21.6)   | 23.0<br>(21.2, 24.7)   | 21.8<br>(20.0, 23.7)   | 19.5<br>(17.0, 22.0)   | 21.8<br>(19.2, 24.5)   | 28.1<br>(26.4, 29.7)   | 18.0<br>(16.4, 19.6)   | 27.1<br>(25.3, 28.9)   |
| Latino/a                                   | 21.9<br>(18.4, 25.4)   | 24.5<br>(21.6, 27.4)   | 23.2<br>(20.6, 25.9)   | 26.0<br>(23.7, 28.3)   | 25.7<br>(23.4, 27.9)   | 25.1<br>(22.2, 28.1)   | 30.1<br>(27.3, 32.9)   | 34.4<br>(31.8, 37.0)   | 22.9<br>(19.9, 26.0)   | 34.4<br>(31.5, 37.3)   |
| Black                                      | 20.7<br>(16.7, 24.7)   | 22.7<br>(19.9, 25.5)   | 18.4<br>(15.3, 21.5)   | 18.9<br>(16.9, 20.9)   | 19.7<br>(17.1, 22.2)   | 18.9<br>(16.4, 21.3)   | 20.7<br>(17.9, 23.5)   | 26.9<br>(24.0, 29.9)   | 19.3<br>(13.4, 25.2)   | 26.6<br>(23.2, 30.1)   |
| Asian                                      | 19.1<br>(11.0, 27.2)   | 21.3<br>(16.5, 26.0)   | 21.6<br>(15.0, 28.3)   | 21.8<br>(16.8, 26.7)   | 19.6<br>(15.2, 24.0)   | 17.6<br>(10.2, 25.0)   | 15.9<br>(8.9, 22.8)    | 26.7<br>(20.5, 33.0)   | 18.0<br>(12.5, 23.5)   | 27.8<br>(22.3, 33.4)   |
| AI/AN/NHPI                                 | 34.2<br>(21.1, 47.3)   | 27.1<br>(19.9, 34.3)   | 21.0<br>(12.6, 29.3)   | 18.9<br>(11.6, 26.1)   | 27.8<br>(17.9, 37.8)   | 20.8<br>(10.5, 31.0)   | 18.0<br>(5.8, 30.2)    | 25.6<br>(17.3, 34.0)   | 32.8<br>(23.1, 42.5)   | 26.0<br>(16.0, 36.1)   |

*Notes:* Weighted sample characteristics for gender, age, race/ethnicity, grade, and living with a smoker from 1999 to 2014 appear in El-Toukhy et al., 2016, *Pediatrics*. Smoking susceptibility for 2012 to 2014 differ from our previously published work (El-Toukhy et al., 2016, *Pediatrics*, see Methods and Discussion sections). Because of our new coding of smoking susceptibility, *ns* for 2012, 2013, 2014 have increased by 1, 1, and 5, respectively, compared to *ns* in El-Toukhy et al., 2016, *Pediatrics*. These participants were previously declared missing on susceptibility because they did not answer *no* for all three questions but were recoded as *yes* in the current analyses.

<sup>a</sup>Cells represent percent of smoking-susceptible U.S. boys and girls, overall and by each racial/ethnic group, per year.

AI/AN/NHPI, American Indian/ Alaska Native/ Native Hawaiian Pacific Islander.

**Appendix**  
**Adolescent Smoking Susceptibility: Gender-Stratified Racial and Ethnic Differences, 1999–2018**  
**Kamke et al.**

**Appendix Table 3.** Weighted Sample Characteristics by Year, 2015–2018, and Sample Total, 1999–2018

| Characteristic                             | 2015                | 2016                | 2017                | 2018                | Total                    |
|--------------------------------------------|---------------------|---------------------|---------------------|---------------------|--------------------------|
|                                            | (n=13,657)          | (n=16,616)          | (n=14,528)          | (n=16,331)          | (N=205,056) <sup>a</sup> |
|                                            | Weighted % (95% CI)      |
| Sex (Missing=849)                          |                     |                     |                     |                     |                          |
| Girl                                       | 50.0 (48.4, 51.6)   | 49.8 (48.6, 51.0)   | 49.2 (47.9, 50.5)   | 50.2 (48.8, 51.7)   | 50.5 (50.1, 50.9)        |
| Boy                                        | 49.9 (48.3, 51.5)   | 50.1 (48.9, 51.3)   | 50.7 (49.4, 52.0)   | 49.7 (48.2, 51.1)   | 49.4 (49.0, 49.8)        |
| Age <sup>b</sup> (Missing=696)             | 14.3 (14.0, 14.5)   | 14.3 (14.1, 14.4)   | 14.3 (14.1, 14.5)   | 14.3 (14.2, 14.5)   | 14.2 (14.1, 14.2)        |
| Race/Ethnicity (Missing=6,606)             |                     |                     |                     |                     |                          |
| White                                      | 57.8 (51.6, 64.0)   | 56.1 (50.1, 62.0)   | 56.2 (48.6, 63.8)   | 55.5 (50.4, 60.7)   | 60.2 (58.6, 61.7)        |
| Latino/a                                   | 22.7 (17.9, 27.5)   | 24.7 (20.0, 29.3)   | 24.0 (17.9, 30.1)   | 24.6 (20.1, 29.0)   | 19.9 (18.9, 20.9)        |
| Black                                      | 14.2 (10.2, 18.3)   | 13.3 (9.8, 16.8)    | 13.6 (10.3, 16.8)   | 13.4 (10.3, 16.4)   | 14.4 (13.4, 15.4)        |
| Asian                                      | 3.8 (2.8, 4.9)      | 4.6 (3.3, 5.9)      | 4.8 (3.2, 6.4)      | 5.2 (3.6, 6.8)      | 4.3 (3.9, 4.7)           |
| AI/AN/NHPI                                 | 1.2 (0.8, 1.7)      | 1.1 (0.8, 1.4)      | 1.1 (0.9, 1.4)      | 1.1 (0.9, 1.4)      | 1.1 (1.0, 1.2)           |
| Grade (Missing=685)                        |                     |                     |                     |                     |                          |
| Middle school                              | 50.3 (43.3, 57.2)   | 49.3 (43.5, 55.0)   | 48.4 (42.6, 54.2)   | 48.8 (43.7, 53.8)   | 51.3 (49.6, 53.0)        |
| High school                                | 49.6 (42.7, 56.6)   | 50.6 (44.9, 56.4)   | 51.5 (45.7, 57.3)   | 51.1 (46.1, 56.2)   | 48.6 (46.9, 50.3)        |
| Living with a smoker (Missing=1,409)       |                     |                     |                     |                     |                          |
| No                                         | 77.4 (75.5, 79.2)   | 77.3 (75.5, 79.2)   | 78.6 (76.1, 81.1)   | 78.1 (76.3, 79.9)   | 74.7 (74.1, 75.2)        |
| Yes                                        | 22.5 (20.7, 24.4)   | 22.6 (20.7, 24.4)   | 21.3 (18.8, 23.8)   | 21.8 (20.0, 23.6)   | 25.2 (24.7, 25.8)        |
| Susceptibility to smoking <sup>c</sup>     |                     |                     |                     |                     |                          |
| No                                         | 72.7 (71.0, 74.4)   | 69.9 (68.6, 71.2)   | 71.4 (70.1, 72.8)   | 70.8 (69.5, 72.2)   | 74.8 (74.3, 75.2)        |
| Yes                                        | 27.2 (25.5, 28.9)   | 30.0 (28.7, 31.3)   | 28.5 (27.1, 29.8)   | 29.1 (27.7, 30.4)   | 25.1 (24.7, 25.6)        |
| Girls' susceptibility overall <sup>d</sup> | 27.5 (25.4, 29.5)   | 29.3 (27.4, 31.1)   | 28.0 (26.2, 29.8)   | 28.5 (26.8, 30.2)   | 24.7 (24.1, 25.2)        |
| White                                      | 24.8 (22.1, 27.5)   | 25.0 (22.9, 27.1)   | 27.2 (25.6, 28.8)   | 27.2 (25.4, 29.0)   | 22.9 (22.3, 23.6)        |
| Latino/a                                   | 34.6 (31.4, 37.8)   | 41.3 (37.9, 44.6)   | 35.8 (31.6, 39.9)   | 35.7 (32.1, 39.2)   | 32.9 (31.8, 34.1)        |
| Black                                      | 26.4 (22.4, 30.4)   | 25.7 (23.1, 28.3)   | 20.9 (17.9, 24.0)   | 23.2 (20.0, 26.4)   | 21.3 (20.3, 22.4)        |
| Asian                                      | 25.3 (18.4, 32.2)   | 22.3 (18.1, 26.5)   | 21.6 (16.1, 27.0)   | 23.7 (18.6, 28.8)   | 20.9 (19.1, 22.8)        |
| AI/AN/NHPI                                 | 45.0 (35.4, 54.6)   | 35.2 (26.1, 44.2)   | 22.1 (13.4, 30.8)   | 23.8 (11.4, 36.2)   | 27.7 (24.2, 31.3)        |
| Boys' susceptibility overall <sup>d</sup>  | 27.0 (25.1, 29.0)   | 31.2 (29.8, 32.5)   | 28.9 (27.3, 30.5)   | 30.1 (28.2, 31.9)   | 25.7 (25.1, 26.2)        |
| White                                      | 26.2 (23.3, 29.1)   | 29.7 (27.8, 31.5)   | 28.0 (26.0, 30.1)   | 29.9 (27.6, 32.2)   | 24.6 (24.0, 25.3)        |
| Latino/a                                   | 31.3 (28.8, 33.7)   | 37.1 (34.0, 40.2)   | 35.3 (32.5, 38.1)   | 33.7 (31.1, 36.3)   | 31.3 (30.3, 32.3)        |
| Black                                      | 22.4 (19.4, 25.4)   | 28.4 (25.5, 31.4)   | 22.6 (19.0, 26.2)   | 25.1 (21.4, 28.8)   | 22.7 (21.6, 23.8)        |
| Asian                                      | 27.9 (20.8, 35.1)   | 27.0 (23.6, 30.4)   | 24.9 (18.3, 31.5)   | 25.9 (20.6, 31.2)   | 23.3 (21.5, 25.1)        |
| AI/AN/NHPI                                 | 35.5 (26.0, 45.0)   | 34.6 (24.5, 44.7)   | 26.8 (16.2, 37.4)   | 34.5 (24.9, 44.1)   | 27.7 (24.8, 30.7)        |

Notes: Unweighted missing data ranged from <1% for sex, age, school, and living with a smoker to 3.5% for race/ethnicity.

<sup>a</sup>Total N=205,056 represents unweighted sample size of never smokers from 1999 to 2018. Participant characteristics for years 1999 to 2014 appear in El-Toukhy et al.<sup>6</sup>

<sup>b</sup>Cells represent mean (CIs).

<sup>c</sup>Susceptibility to smoking has no missing data because participants who (1) did not answer any of the 3 susceptibility questions or (2) responded *no* to only one or two of the three susceptibility questions were excluded from the study.

<sup>d</sup>Cells represent percent smoking-susceptible U.S. boys and girls, overall and by each racial/ethnic group, per year.

AI/AN/NHPI, American Indian/ Alaska Native/ Native Hawaiian Pacific Islander.

**Appendix**  
**Adolescent Smoking Susceptibility: Gender-Stratified Racial and Ethnic Differences, 1999–2018**  
**Kamke et al.**

**Appendix Table 4A.** Within-Gender Susceptibility to Smoking by Age and Race and Ethnicity, Age 9–21 Years (Age 16–21 Years in Appendix Table 4B)

| Characteristic                         | Age 9                  | Age 10                 | Age 11                 | Age 12                 | Age 13                 | Age 14                 | Age 15                 |
|----------------------------------------|------------------------|------------------------|------------------------|------------------------|------------------------|------------------------|------------------------|
|                                        | (n=83)                 | (n=151)                | (n=15,967)             | (n=36,775)             | (n=37,456)             | (n=31,794)             | (n=26,970)             |
|                                        | Weighted %<br>(95% CI) |
| Girls <sup>a,b</sup>                   | n=27                   | n=91                   | n=8,689                | n=19,129               | n=18,975               | n=15,946               | n=13,748               |
| White                                  | –                      | 34.7 (0.0, 75.8)       | 14.0 (12.4, 15.6)      | 17.1 (15.9, 18.2)      | 23.5 (22.2, 24.7)      | 27.8 (26.3, 29.3)      | 28.0 (26.4, 29.5)      |
| Latino/a                               | 68.0 (41.8, 94.2)      | 30.6 (0.0, 62.2)       | 21.8 (18.8, 24.9)      | 28.9 (26.9, 30.9)      | 37.0 (34.8, 39.1)      | 39.0 (36.7, 41.3)      | 35.6 (33.4, 37.9)      |
| Black                                  | –                      | 8.1 (0.0, 24.2)        | 21.8 (18.4, 25.2)      | 21.9 (19.6, 24.2)      | 25.3 (23.0, 27.7)      | 25.9 (23.3, 28.6)      | 23.3 (20.8, 25.8)      |
| Asian                                  | –                      | 0.02 (0.0, 0.09)       | 14.1 (9.1, 19.1)       | 14.9 (11.3, 18.5)      | 19.2 (15.5, 22.9)      | 23.7 (18.8, 28.5)      | 24.1 (20.3, 27.8)      |
| AI/AN/NHPI                             | –                      | –                      | 19.0 (10.6, 27.4)      | 24.4 (16.0, 32.8)      | 27.4 (20.1, 34.7)      | 30.0 (21.5, 38.5)      | 35.8 (25.9, 45.6)      |
| Overall girls                          | 44.2 (19.3, 69.2)      | 21.9 (7.0, 36.8)       | 16.9 (15.6, 18.3)      | 20.3 (19.3, 21.2)      | 26.4 (25.3, 27.4)      | 29.6 (28.5, 30.8)      | 28.7 (27.6, 29.8)      |
| Boys <sup>a,b</sup>                    | n=51                   | n=60                   | n=7,229                | n=17,522               | n=18,348               | n=15,749               | n=13,141               |
| White                                  | 51.9 (15.6, 88.3)      | –                      | 19.7 (17.5, 21.8)      | 20.9 (19.5, 22.3)      | 25.7 (24.5, 26.9)      | 28.6 (27.1, 30.1)      | 27.3 (25.7, 28.8)      |
| Latino/a                               | 59.4 (37.0, 81.7)      | 47.8 (6.9, 88.7)       | 26.7 (23.4, 30.0)      | 28.9 (26.9, 30.9)      | 33.0 (30.9, 35.0)      | 34.9 (32.7, 37.1)      | 33.2 (31.0, 35.5)      |
| Black                                  | 30.5 (0.0, 69.1)       | 10.3 (0.0, 31.5)       | 20.0 (16.4, 23.5)      | 25.4 (22.9, 27.8)      | 27.6 (24.8, 30.4)      | 26.3 (23.7, 29.0)      | 22.3 (19.9, 24.7)      |
| Asian                                  | 34.6 (0.0, 97.5)       | 23.6 (0.0, 73.7)       | 11.2 (6.4, 15.9)       | 16.1 (12.2, 20.0)      | 24.3 (20.1, 28.5)      | 21.5 (17.4, 25.7)      | 27.7 (23.1, 32.3)      |
| AI/AN/NHPI                             | 11.9 (0.0, 38.6)       | 99.9 (99.8, 100.0)     | 16.5 (6.3, 26.8)       | 27.3 (20.2, 34.4)      | 27.8 (21.2, 34.4)      | 34.7 (27.3, 42.2)      | 30.2 (22.8, 37.6)      |
| Overall boys                           | 47.1 (29.1, 65.1)      | 27.3 (3.8, 50.8)       | 20.9 (19.1, 22.6)      | 23.0 (22.0, 24.1)      | 27.4 (26.4, 28.3)      | 29.3 (28.2, 30.5)      | 27.8 (26.6, 29.0)      |
| Overall<br>race/ethnicity <sup>a</sup> |                        |                        |                        |                        |                        |                        |                        |
| White                                  | 34.4 (8.2, 60.6)       | 13.9 (0.0, 32.7)       | 16.6 (15.2, 17.9)      | 18.9 (18.0, 19.9)      | 24.6 (23.7, 25.5)      | 28.2 (27.1, 29.3)      | 27.6 (26.4, 28.8)      |
| Latino/a                               | 60.3 (43.1, 77.5)      | 37.9 (12.3, 63.6)      | 24.0 (21.6, 26.5)      | 28.9 (27.5, 30.2)      | 34.9 (33.3, 36.5)      | 36.9 (35.3, 38.5)      | 34.4 (32.9, 36.0)      |
| Black                                  | 22.3 (0.0, 50.5)       | 8.9 (0.0, 21.7)        | 20.9 (18.6, 23.3)      | 23.6 (21.9, 25.2)      | 26.5 (24.5, 28.4)      | 26.2 (24.3, 28.0)      | 22.8 (21.1, 24.5)      |
| Asian                                  | 38.2 (0.0, 83.2)       | 14.7 (0.0, 44.1)       | 12.8 (9.5, 16.1)       | 15.6 (12.9, 18.3)      | 22.1 (19.4, 24.8)      | 22.7 (19.3, 26.1)      | 25.7 (22.7, 28.8)      |
| AI/AN/NHPI                             | 11.9 (0.0, 38.5)       | 99.9 (99.8, 100.0)     | 17.8 (11.3, 24.4)      | 25.7 (19.6, 31.7)      | 27.7 (23.3, 32.1)      | 32.2 (26.5, 37.9)      | 33.2 (27.0, 39.4)      |
| Overall                                | 45.7 (31.7, 59.8)      | 24.7 (10.4, 38.9)      | 18.7 (17.5, 19.9)      | 21.6 (20.8, 22.4)      | 26.9 (26.2, 27.6)      | 29.5 (28.6, 30.3)      | 28.2 (27.4, 29.1)      |

Notes: Total N=205,056; unweighted sample size for each age category (top row).

<sup>a</sup>Cells represent percent of susceptible U.S. boys and girls, overall and by each racial/ethnic group, per age category. For example, overall susceptible 11-year old girls represent weighted 1,335 (*n* susceptible) divided by 8,253 (total *n* for 11-year old girls). Susceptible 11-year old white girls represent weighted 557 (*n* susceptible) divided by 3,980 (*n* 11-year old white girls).

<sup>b</sup>*n* for boys and *n* for girls do not sum to year total *n* because of missing data.

AI/AN/NHPI, American Indian/ Alaska Native/ Native Hawaiian Pacific Islander.

**Appendix**  
**Adolescent Smoking Susceptibility: Gender-Stratified Racial and Ethnic Differences, 1999–2018**  
**Kamke et al.**

**Appendix Table 4B (continued).** Within-Gender Susceptibility to Smoking by Race and Ethnicity, Age 9–21 Years (Age 9–15 in Appendix Table 4A)

| Characteristic                         | Age 16                 | Age 17                 | Age 18                 | Age 19                 | Age 20                 | Age 21                 |
|----------------------------------------|------------------------|------------------------|------------------------|------------------------|------------------------|------------------------|
|                                        | ( <i>n</i> =23,539)    | ( <i>n</i> =20,404)    | ( <i>n</i> =10,235)    | ( <i>n</i> =908)       | ( <i>n</i> =32)        | ( <i>n</i> =46)        |
|                                        | Weighted % (95%<br>CI) |
| Girls <sup>a,b</sup>                   | <i>n</i> =12,096       | <i>n</i> =10,556       | <i>n</i> =4,957        | <i>n</i> =382          | <i>n</i> =10           | <i>n</i> =15           |
| White                                  | 23.8 (22.3, 25.4)      | 22.5 (20.8, 24.2)      | 21.8 (19.5, 24.0)      | 24.8 (12.5, 37.1)      | –                      | 0.2 (0.0, 1.0)         |
| Latino/a                               | 33.7 (31.0, 36.4)      | 30.1 (27.0, 33.2)      | 26.7 (23.1, 30.2)      | 31.7 (21.5, 42.0)      | 9.9 (0.0, 32.5)        | 10.3 (0.0, 32.7)       |
| Black                                  | 17.9 (15.3, 20.4)      | 13.7 (11.6, 15.8)      | 15.9 (12.8, 19.0)      | 24.3 (12.6, 35.9)      | –                      | –                      |
| Asian                                  | 20.6 (16.2, 25.1)      | 22.6 (18.6, 26.7)      | 27.3 (18.8, 35.7)      | 9.3 (0.0, 20.1)        | –                      | 11.8 (0.0, 37.2)       |
| AI/AN/NHPI                             | 39.4 (28.4, 50.5)      | 21.0 (12.0, 30.0)      | 4.1 (0.0, 10.2)        | 0.2 (0.0, 0.7)         | –                      | 100.0 (100.0, 100.0)   |
| Overall girls                          | 24.7 (23.5, 25.9)      | 22.5 (21.2, 23.8)      | 21.9 (20.2, 23.6)      | 25.8 (19.4, 32.2)      | 8.5 (0.0, 27.2)        | 12.0 (0.0, 28.4)       |
| Boys <sup>a,b</sup>                    | <i>n</i> =11,369       | <i>n</i> =9,787        | <i>n</i> =5,248        | <i>n</i> =520          | <i>n</i> =22           | <i>n</i> =30           |
| White                                  | 25.0 (23.5, 26.6)      | 22.8 (21.3, 24.4)      | 22.2 (20.0, 24.3)      | 23.4 (15.1, 31.7)      | –                      | –                      |
| Latino/a                               | 30.7 (28.1, 33.2)      | 29.6 (26.9, 32.2)      | 25.3 (21.8, 28.7)      | 29.7 (20.0, 39.3)      | 15.9 (0.0, 39.9)       | 56.7 (24.2, 89.2)      |
| Black                                  | 18.4 (16.2, 20.7)      | 17.7 (15.1, 20.3)      | 15.3 (12.4, 18.1)      | 16.2 (8.2, 24.2)       | –                      | 16.6 (0.0, 47.5)       |
| Asian                                  | 30.3 (25.1, 35.6)      | 22.3 (18.1, 26.5)      | 31.2 (22.8, 39.5)      | 28.0 (8.7, 47.4)       | –                      | 50.5 (0.0, 100.0)      |
| AI/AN/NHPI                             | 30.0 (22.0, 37.9)      | 19.5 (10.1, 28.9)      | 27.3 (12.3, 42.2)      | –                      | –                      | –                      |
| Overall boys                           | 25.4 (24.2, 26.6)      | 23.3 (22.1, 24.5)      | 22.1 (20.5, 23.8)      | 22.5 (17.6, 27.4)      | 6.8 (0.0, 17.9)        | 32.4 (9.1, 55.7)       |
| Overall<br>race/ethnicity <sup>a</sup> |                        |                        |                        |                        |                        |                        |
| White                                  | 24.5 (23.3, 25.7)      | 22.7 (21.5, 24.0)      | 22.0 (20.4, 23.6)      | 24.0 (17.3, 30.7)      | –                      | 0.02 (0.0, 0.07)       |
| Latino/a                               | 32.2 (30.1, 34.4)      | 29.9 (27.6, 32.2)      | 26.1 (23.5, 28.7)      | 31.0 (23.6, 38.3)      | 13.4 (0.0, 30.8)       | 45.6 (14.8, 76.5)      |
| Black                                  | 18.2 (16.5, 19.8)      | 15.4 (13.7, 17.2)      | 15.6 (13.6, 17.7)      | 19.5 (13.8, 25.2)      | –                      | 14.0 (0.0, 40.1)       |
| Asian                                  | 25.3 (21.8, 28.8)      | 22.6 (19.6, 25.6)      | 29.1 (22.8, 35.4)      | 21.8 (7.4, 36.2)       | –                      | 18.4 (0.0, 47.2)       |
| AI/AN/NHPI                             | 34.9 (28.2, 41.6)      | 20.2 (13.7, 26.8)      | 18.8 (8.4, 29.1)       | 0.02 (0.0, 0.06)       | –                      | 100.0 (100.0, 100.0)   |
| Overall                                | 25.1 (24.2, 26.0)      | 22.9 (22.0, 23.9)      | 22.0 (20.8, 23.3)      | 23.9 (20.3, 27.6)      | 7.3 (0.0, 16.8)        | 26.2 (8.0, 44.4)       |

Notes: Total *N*=205,056; unweighted sample size for each age category (top row).

<sup>a</sup>Cells represent percent of susceptible U.S. boys and girls, overall and by each racial/ethnic group, per age category. For example, overall susceptible 11-year old girls represent weighted 1,335 (*n* susceptible) divided by 8,253 (total *n* for 11-year old girls). Susceptible 11-year old white girls represent weighted 557 (*n* susceptible) divided by 3,980 (*n* 11-year old white girls).

<sup>b</sup>*n* for boys and *n* for girls do not sum to year total *n* because of missing data.

AI/AN/NHPI, American Indian/ Alaska Native/ Native Hawaiian Pacific Islander.
